# Supplementary material for: Predicting ligand removal energetics in thiolate-protected nanoclusters from molecular complexes
Source: Royal Society of Chemistry journal article supplement (doi:10.1039/d0nr07839e), 2021-01-01
Supplement: d0nr07839e1.pdf [file d0nr07839e1.pdf]

## Supporting Information

### Predicting Ligand Removal Energetics in Thiolate-protected Nanoclusters from Molecular Complexes

Julia McKay<sup>1</sup>, Michael J. Cowan<sup>1</sup>, Cristian A. Morales-Rivera<sup>1</sup>, and Giannis Mpourmpakis<sup>1,\*</sup>

<sup>1</sup>Department of Chemical and Petroleum Engineering, University of Pittsburgh, Pittsburgh, PA 15261, USA

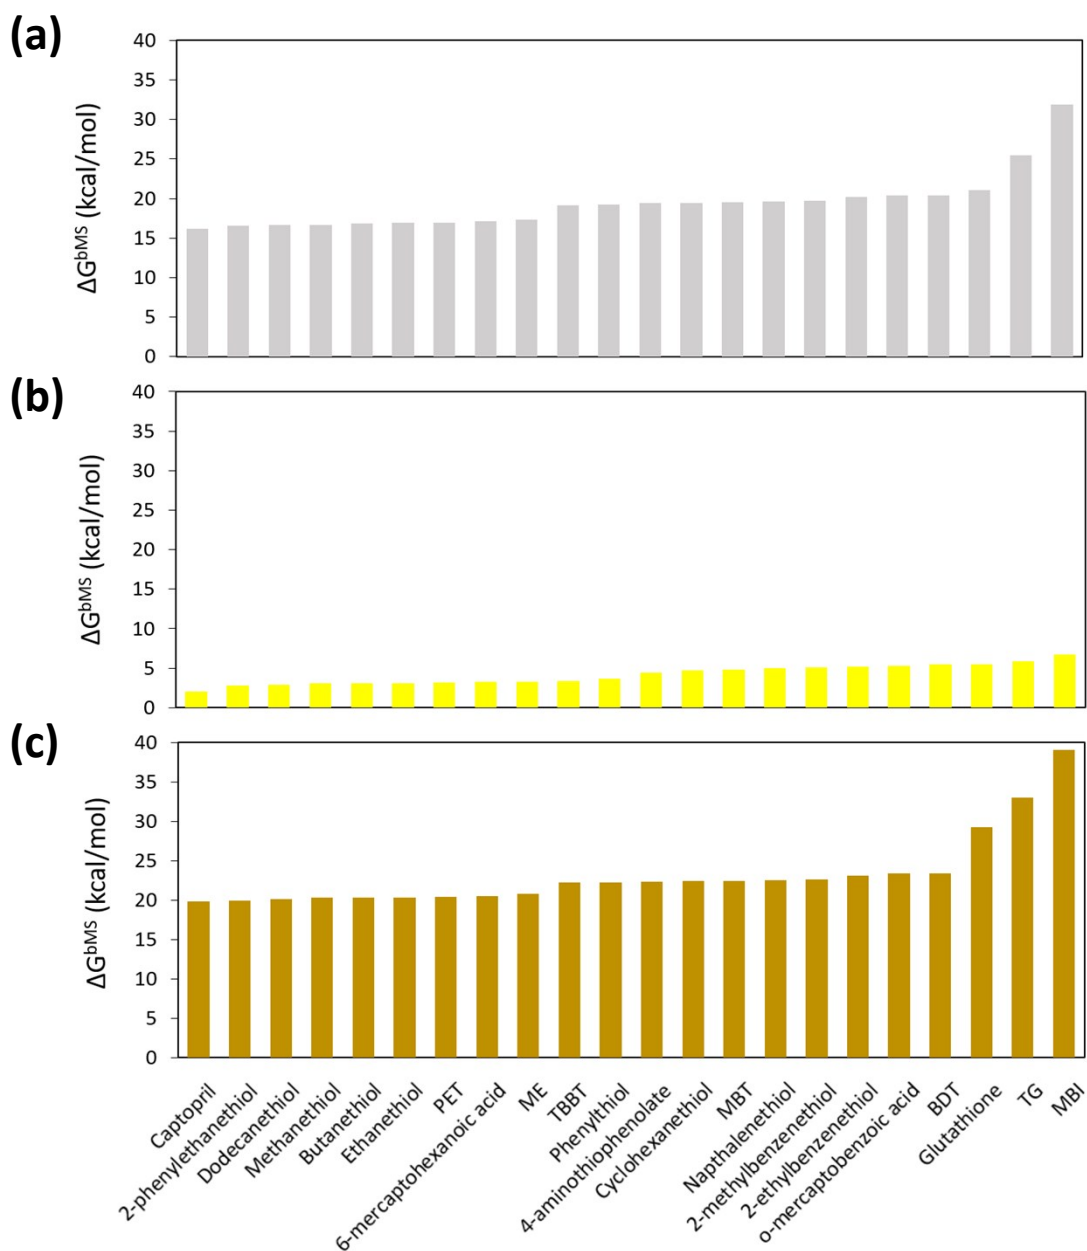

**Figure S1.** Bar graphs of Gibbs Free Energy of break M-S reaction for (a) Ag, (b) Au, and (c) Cu. Each bar corresponds to one of the twenty-two ligands.

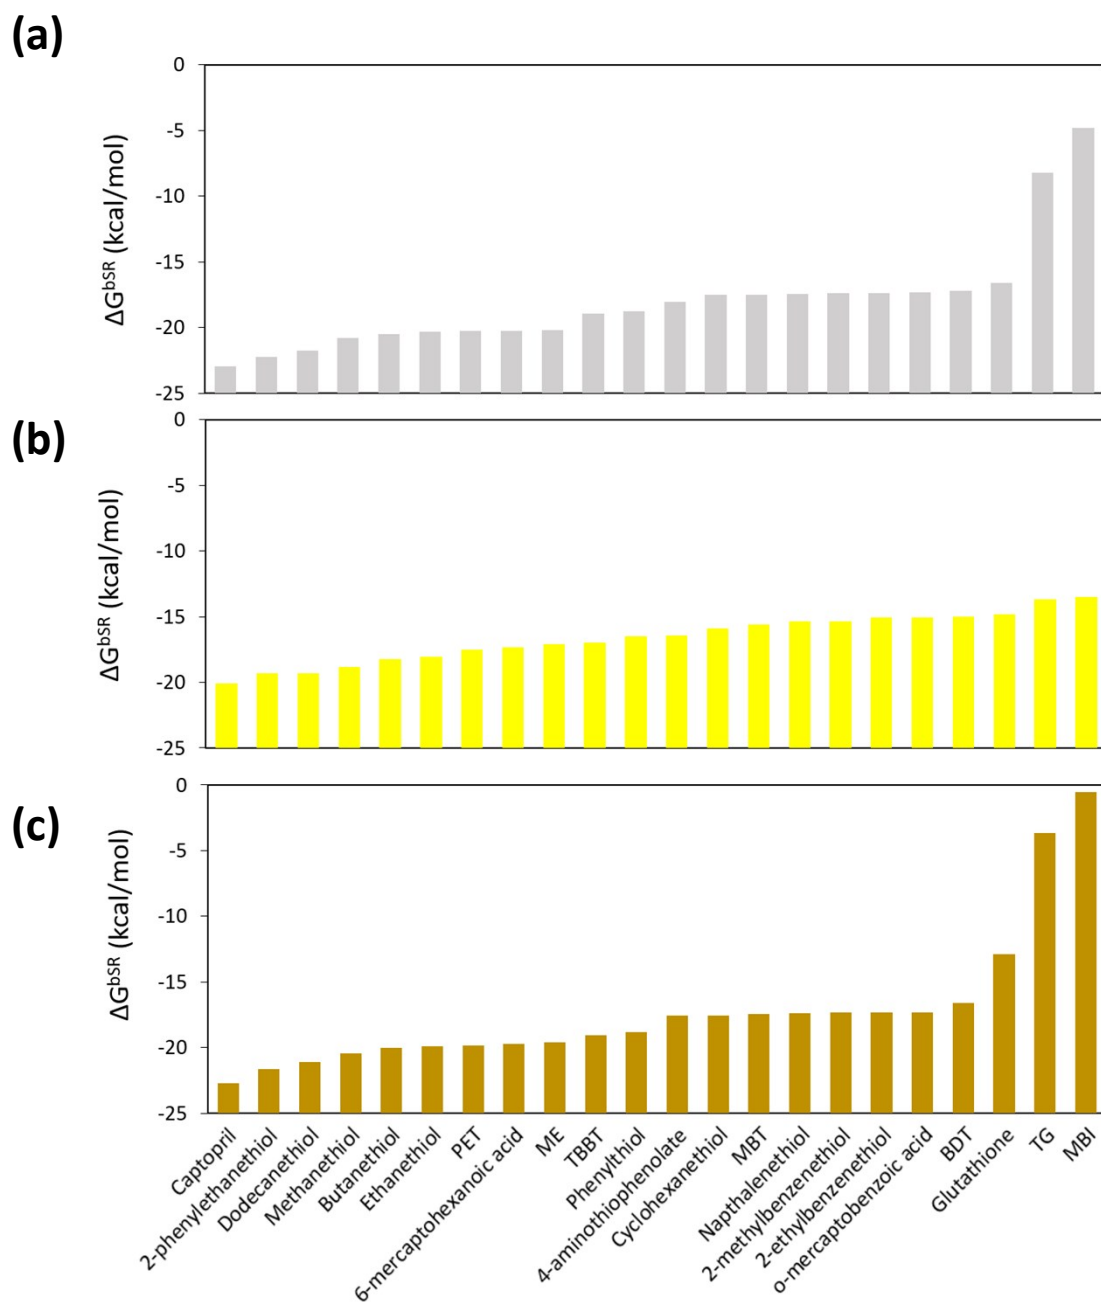

**Figure S2.** Bar graphs of Gibbs Free Energy of break S-R reaction for **(a)** Ag, **(b)** Au, and **(c)** Cu. Each bar corresponds to one of the twenty-two ligands.

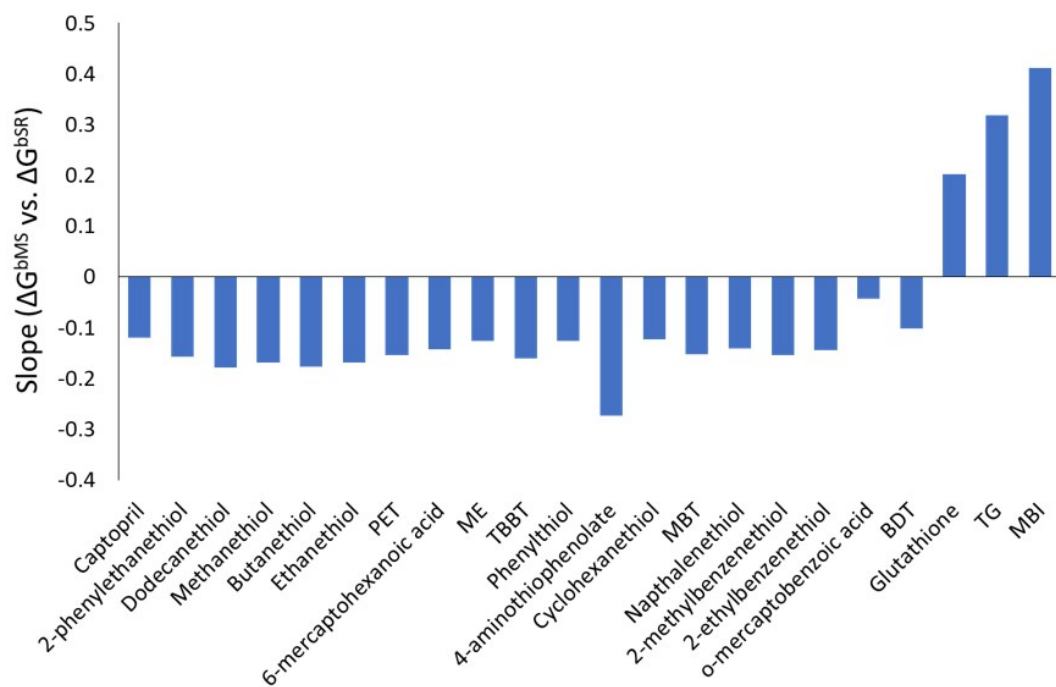

**Figure S3.** Slope ( $m$ ) of linear regression line determined from solving  $\Delta G^{bMS} = m\Delta G^{bSR} + b$  between metal thiolate complexes with the same ligand (Au-SR, Ag-SR, Cu-SR). Each bar represents one of the twenty-two ligands studied.

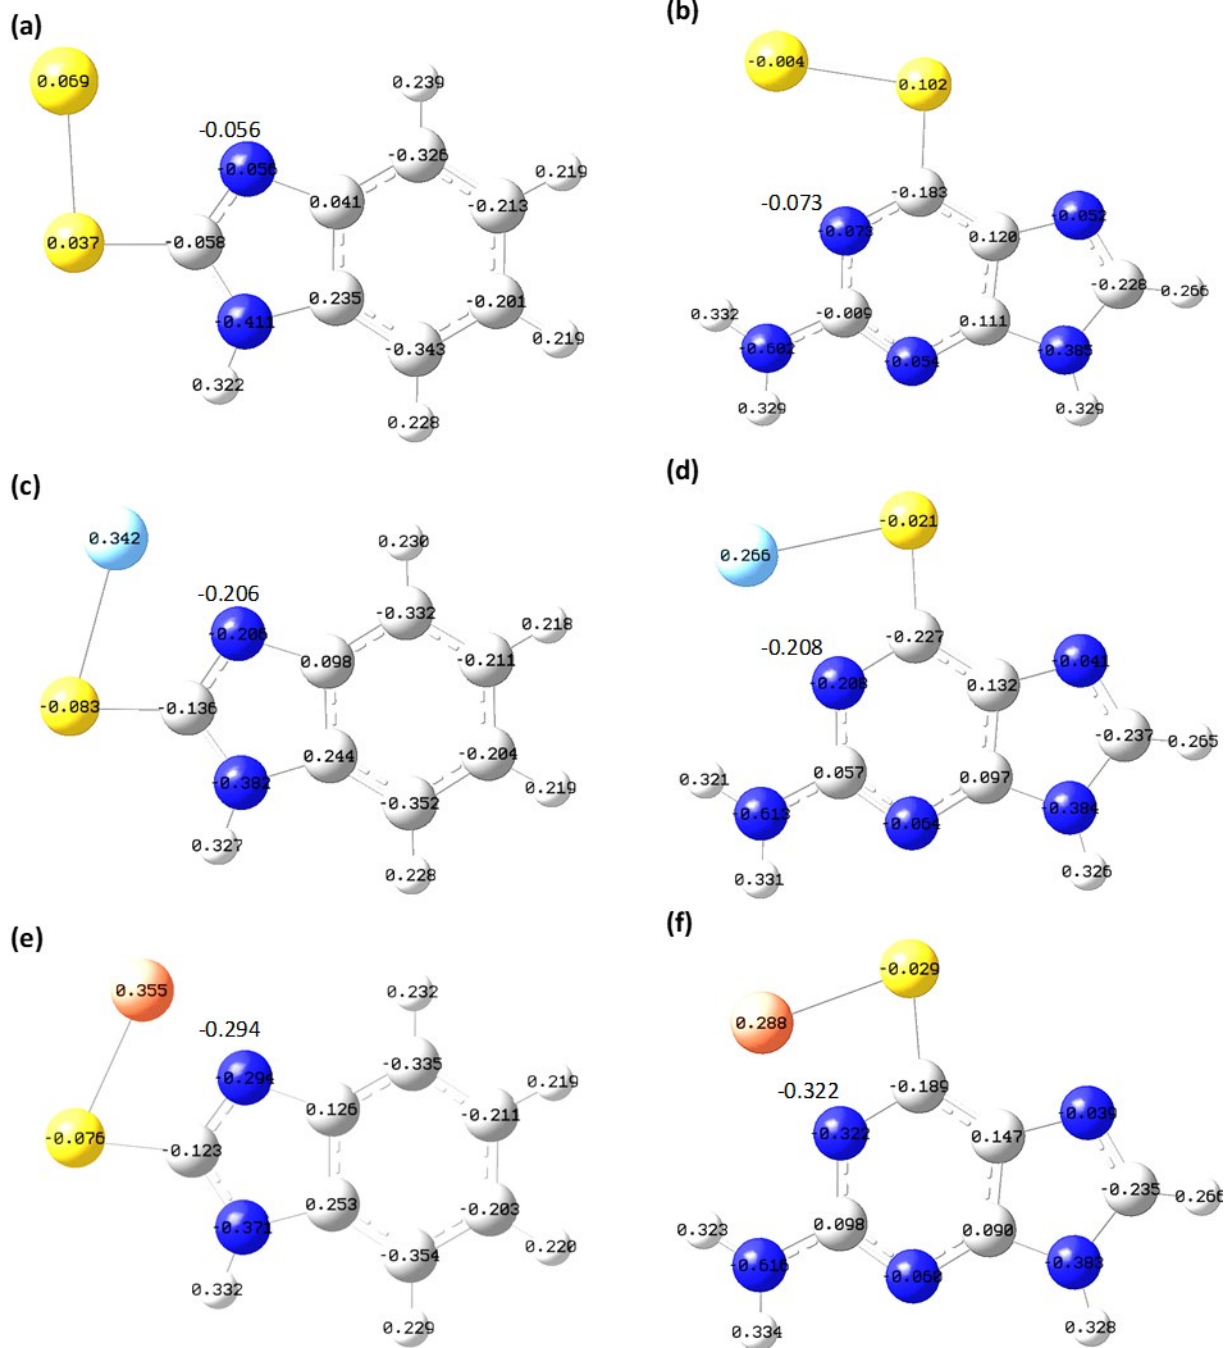

**Figure S4.** Mulliken Charge distribution on metal thiolate complexes for: **(a)** AuMBI, **(b)** AuTG, **(c)** AgMBI, **(d)** AgTG, **(e)** CuMBI, **(f)** CuTG.

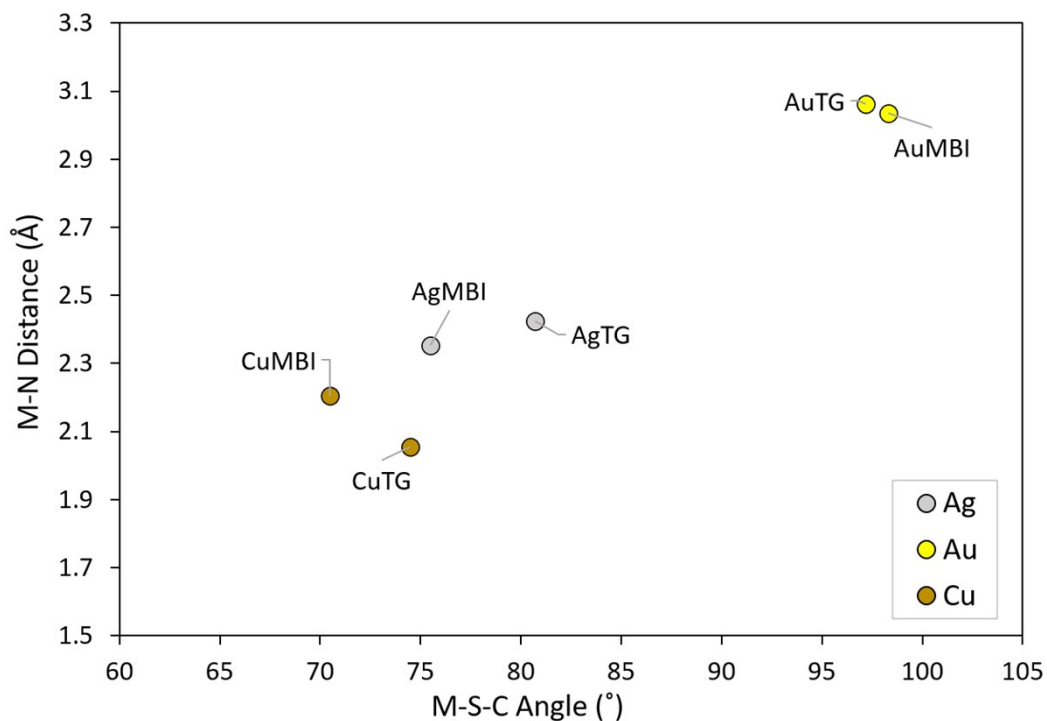

**Figure S5.** Metal-Sulfur-Carbon (M-S-C) bond angle versus Metal-Nitrogen (M-N) distance for metal thiolate complexes for M = Ag, Au, Cu and SR = MBI, TG.

**Table S1.** Bond order calculations for M-N atoms (M = Au, Ag, Cu; closest N in ligand) for the TG- and MBI-based complexes shown in Figure S4.

| Complex | Bond Order |
|---------|------------|
| AuMBI   | 0.063      |
| AuTG    | 0.056      |
| AgMBI   | 0.182      |
| AgTG    | 0.167      |
| CuMBI   | 0.228      |
| CuTG    | 0.227      |

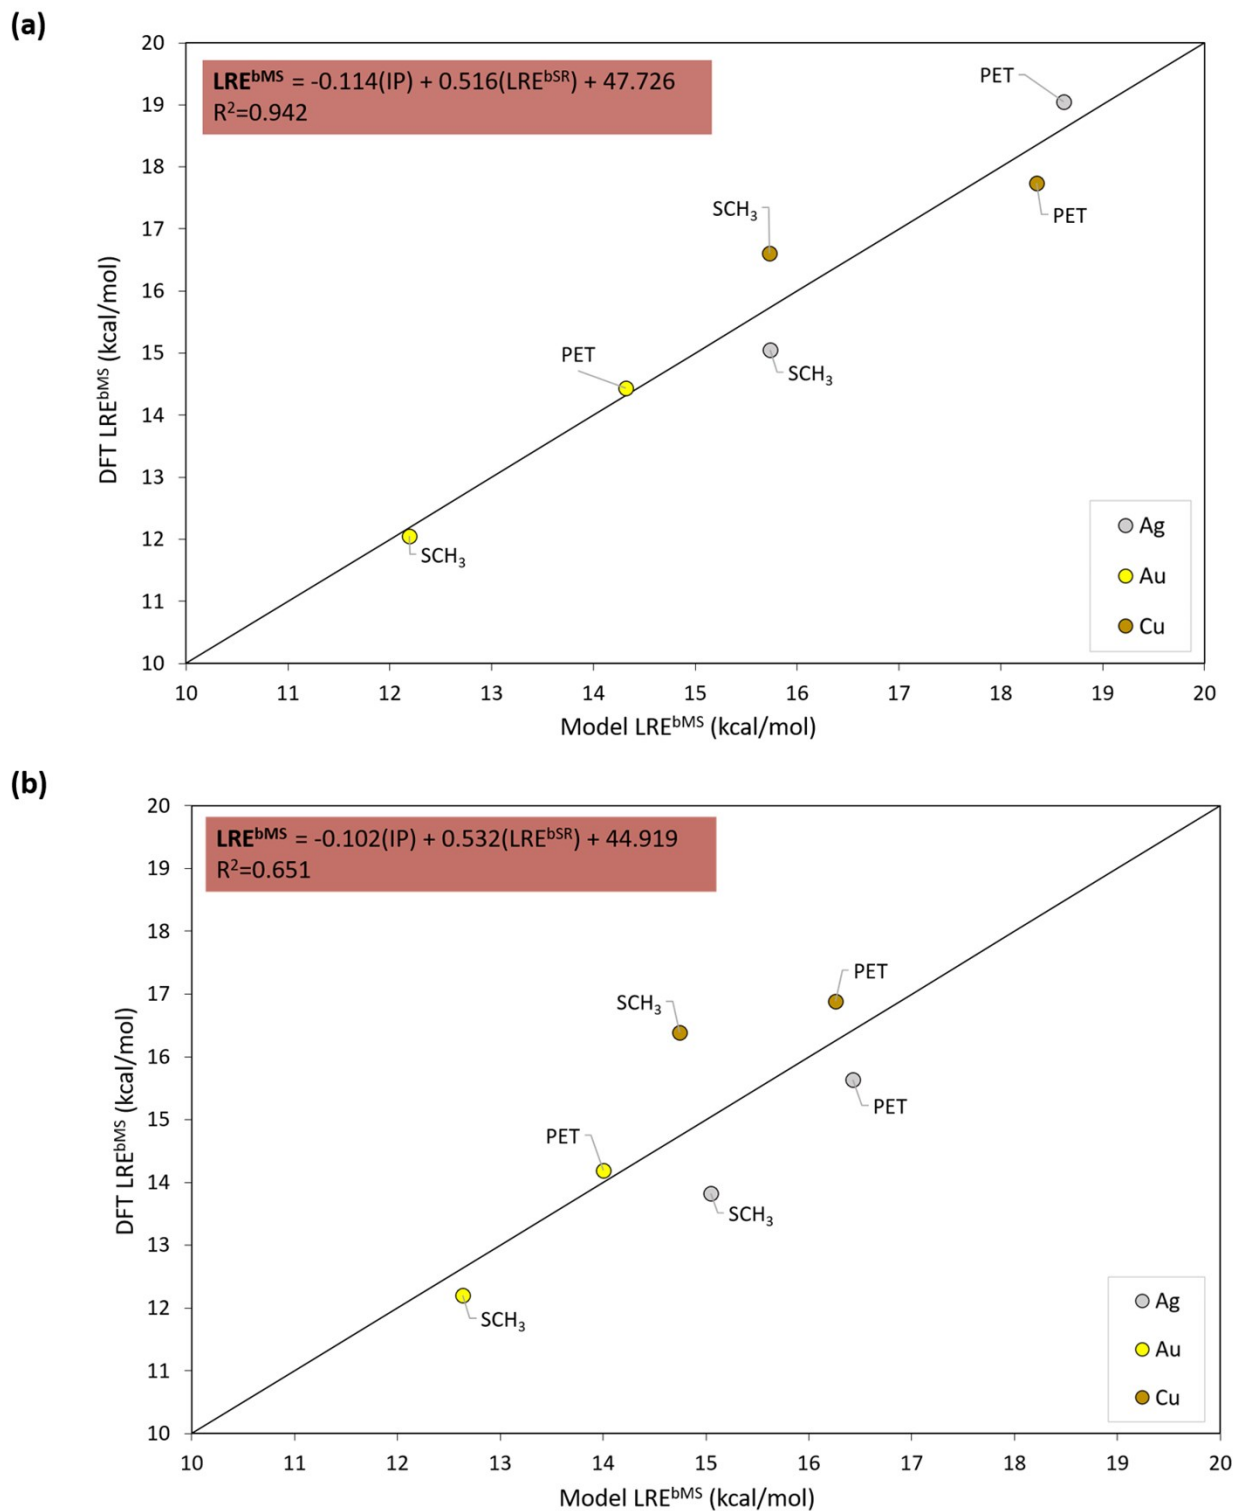

**Figure S6.** Linear regression models (x-axis Model LRE<sup>bMS</sup> and equations in red boxes) connecting LRE<sup>bMS</sup>, LRE<sup>bSR</sup>, and metal IP for the **(a)** A and **(b)** B ligand removal sites on [M<sub>25</sub>(SR)<sub>18</sub>]<sup>-</sup>. The points are colored according to the three metal types (Ag, Au, Cu) and the ligand types are labeled (SCH<sub>3</sub> and PET).

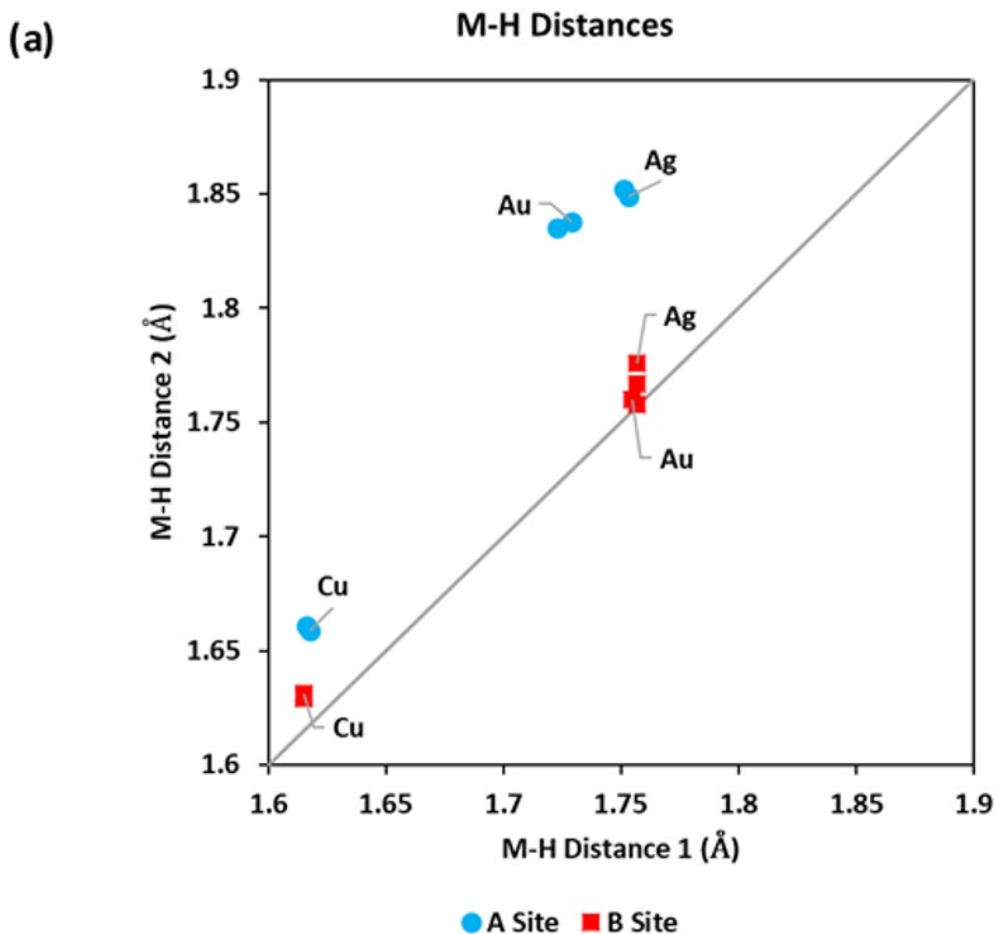

(b)

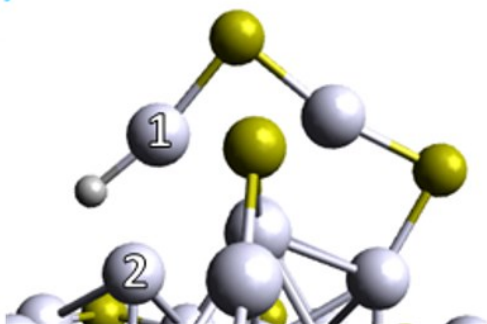

(c)

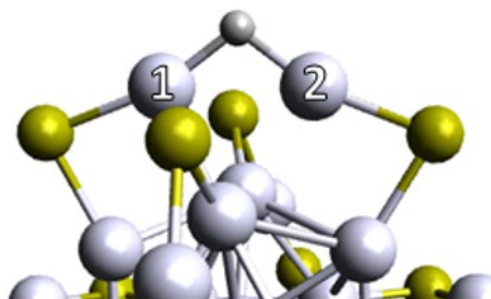

**Figure S7.** (a) Comparing metal-hydrogen (M-H) distances in products of TPNC break M-S reactions. Gray line corresponds to equivalent distances (parity). The plot shows the difference in configurations between (b) A site removal (light blue, 1 = shell and 2 = core metal) and (c) B site removal (red, 1 = shell and 2 = shell metal). Ag TPNCs are used to represent the different configurations. R groups are omitted for clarity.

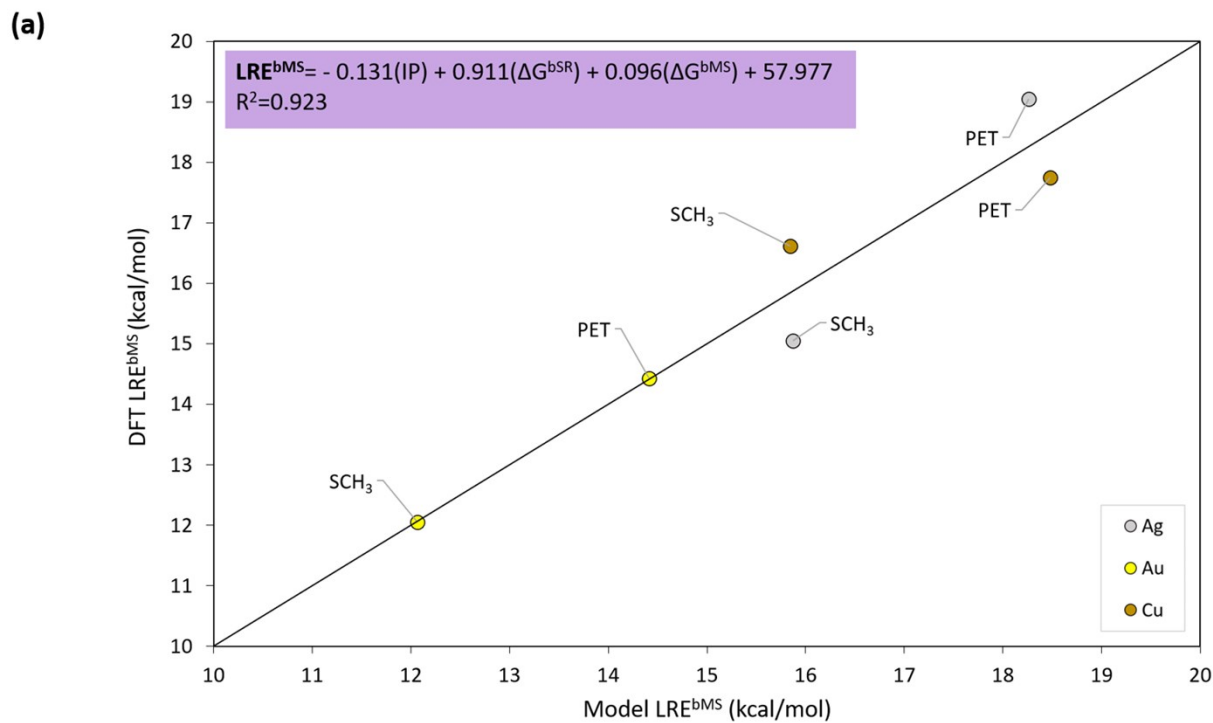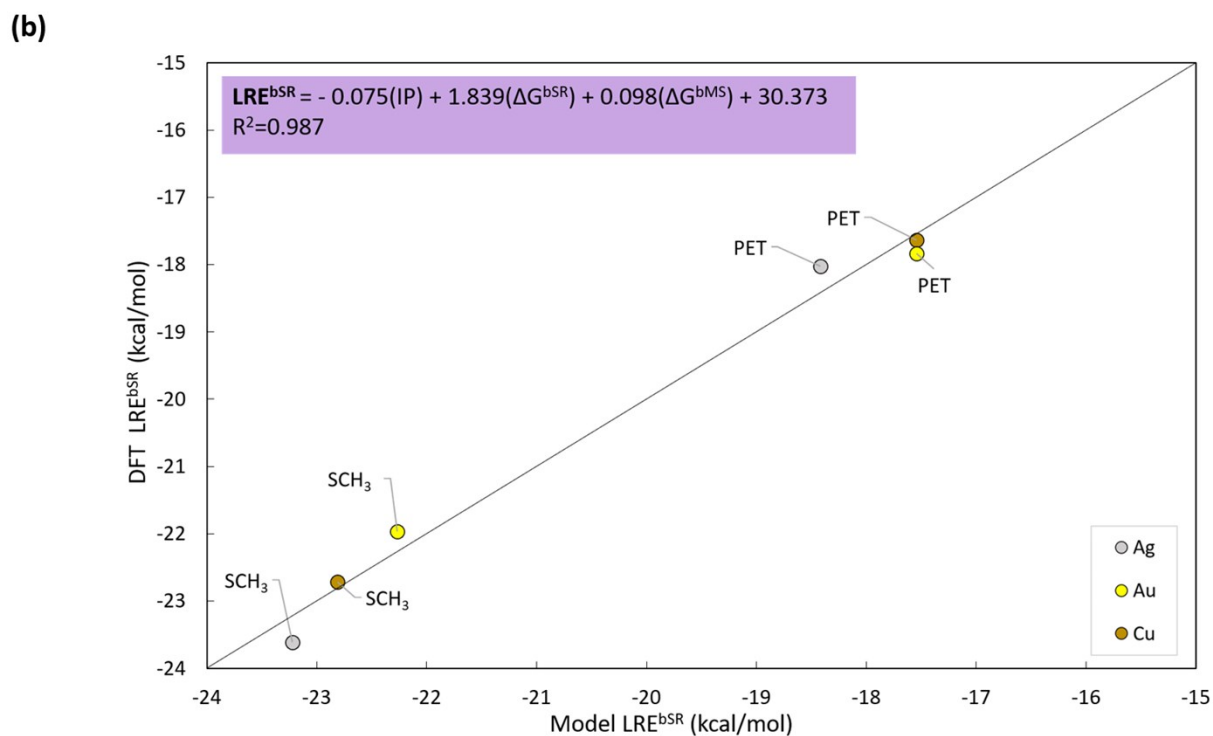

**Figure S8.** Parity plots of linear regression models (x-axis Model  $LRE^{bSR}$ , equations in purple boxes) that reveal strong correlations between  $\Delta G^{bSR}$ ,  $\Delta G^{bMS}$ , and metal IP with A removal site LREs for the **(a)** break M-S and **(b)** break S-R TPNC reactions.



## Investigating Break M-S and Break S-R Kinetics on $\text{MSCH}_3$ (M = Au, Ag, Cu)

### Methods

The geometries of all intermediates and transition states for the mechanism of the break S-R and M-S bonds for  $\text{MSCH}_3$  complexes (M = Ag, Au, Cu) were optimized using the B3LYP functional<sup>1, 2</sup> and the LANL2DZ basis set<sup>3</sup>. Frequency calculations were performed to confirm that each stationary point is either a minimum or a transition structure. Intrinsic reaction coordinates (IRC) calculations were used to confirm the path connection between the reactant, product, and transition state<sup>4</sup>. Each structure reported in the reaction coordinate diagrams is the lowest energy conformer as indicated by the calculations. Turnover frequencies (TOF) of the thiolate-protected nanoclusters, were calculated using the energy span model<sup>5</sup> as a means to evaluate the kinetic preference of each mechanism (at room temperature). Images of the 3D molecular structures, on the energy profiles, were generated using CYLView<sup>6</sup>.

In order to investigate the mechanisms of hydrogenation reactions, we calculated the transition states (TS) for the  $\text{SCH}_3$ -based complexes (methanethiol in Figure 1a; Au, Ag, and Cu). Both concerted and stepwise mechanisms were taken into consideration as shown in Figures S9-S11. Our results reveal that the break M-S reaction follows the same concerted mechanism for the three metals –  $\text{H}_2$  dissociates onto M and S (TS1, TS5, and TS8 in Figures S9-S11, respectively) followed by the desorption of  $\text{HSCH}_3$  from the metal.  $\text{AuSCH}_3$  was found to have the largest barrier (44.5 kcal / mol) compared to  $\text{AgSCH}_3$  and  $\text{CuSCH}_3$  (34.1 and 36.3 kcal / mol, respectively), demonstrating the strength of the Au-S bond. A concerted mechanism was also found for break S-R reactions, where  $\text{H}_2$  dissociates onto S and C. However, the energy barrier for this mechanism (red line in Figures S9-S11) was found to be very large for the three complexes (> 75 kcal / mol). Instead, stepwise mechanisms were found to be more kinetically favorable for break S-R on the  $\text{MSCH}_3$  complexes. Of note, the results show that  $\text{AuSCH}_3$  follows a different stepwise mechanism relative to  $\text{AgSCH}_3$  and  $\text{CuSCH}_3$ . After dissociating  $\text{H}_2$  onto M and S (TS1, TS5, and TS8 in Figures S9-S11, respectively), each hydrogen atom must spillover to an adjacent atom to form the break S-R products ( $\text{CH}_4 + \text{MSH}$ ). For the Au complex (Figure S9), the hydrogen transfer occurs in a stepwise manner, involving a hydrogen migration from S to C through TS2 (Figure S9) followed by a second hydrogen migration from Au to S through TS3 (Figure S9). Both transition states have lower energy barriers than the initial  $\text{H}_2$  dissociation step (as shown in Figure S9). Conversely, Ag and Cu complexes exhibit a single TS, which is larger than each respective  $\text{H}_2$  dissociation step (TS5 and TS8), where both hydrogens are transferred across atoms simultaneously (TS6 and TS9 in Figures S10 and S11, respectively). The metal-dependent mechanisms lead to a difference in reaction preference between complexes. Computing TOFs with the energy span model<sup>5</sup> (given in Figures S1-S3), we find that  $\text{AuSCH}_3$  prefers the break S-R reaction (Equation 1) while  $\text{AgSCH}_3$  and  $\text{CuSCH}_3$  prefer the break M-S reaction (Equation 2). Overall, the reaction coordinate diagrams provide detailed mechanistic understanding of the ligand dissociation reactions in the metal-thiolate complexes.

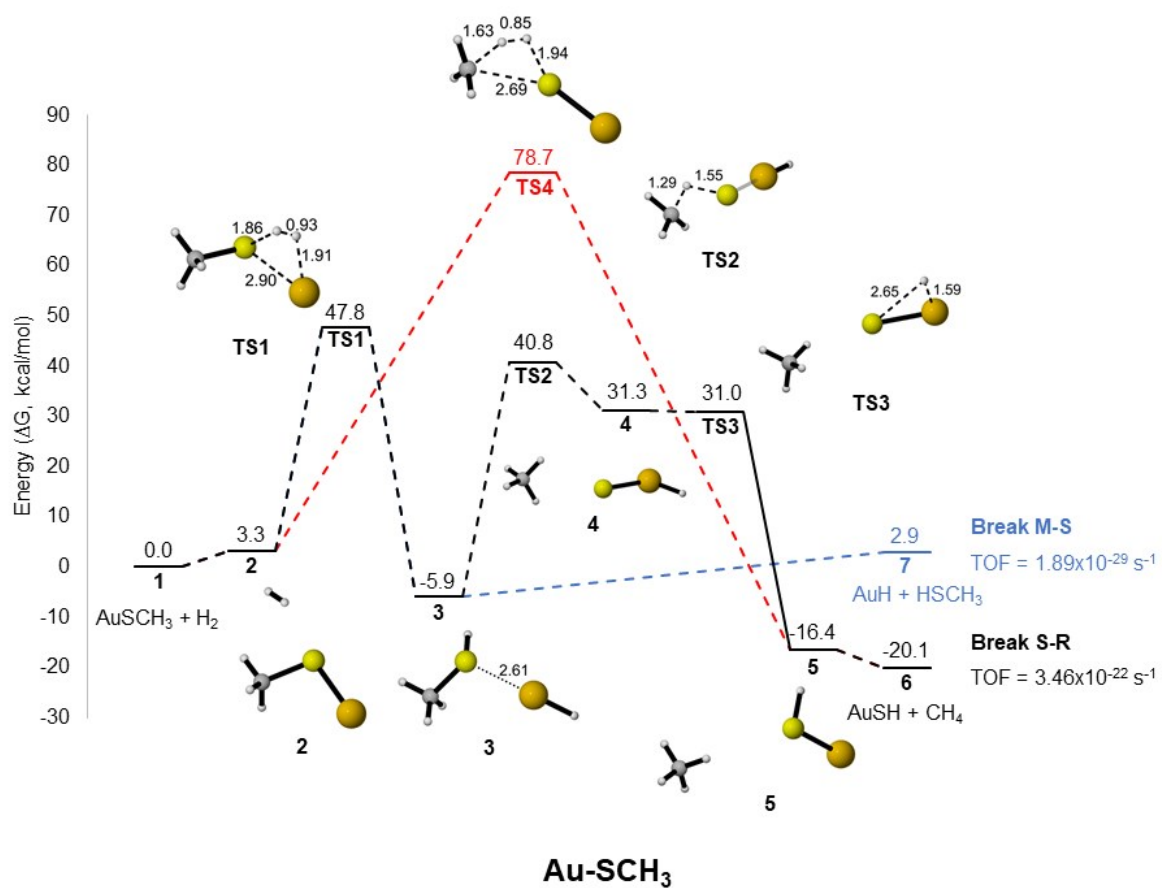

**Figure S9.** Reaction coordinate diagram depicting break M-S (concerted, blue) and two break S-R (concerted in red and stepwise in black) mechanisms on the AuSCH<sub>3</sub> complex.

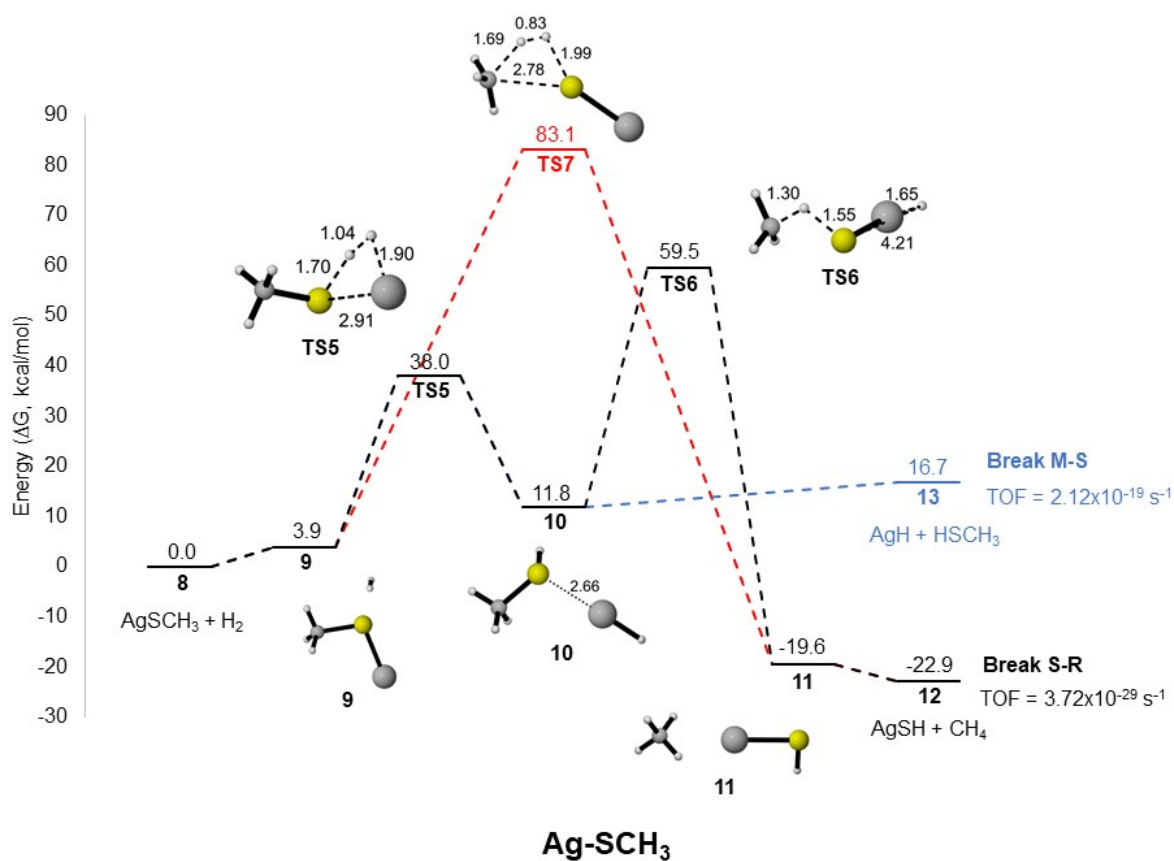

**Figure S10.** Reaction coordinate diagram depicting break M-S (concerted, blue) and two break S-R (concerted in red and stepwise in black) mechanisms on the AgSCH<sub>3</sub> complex.

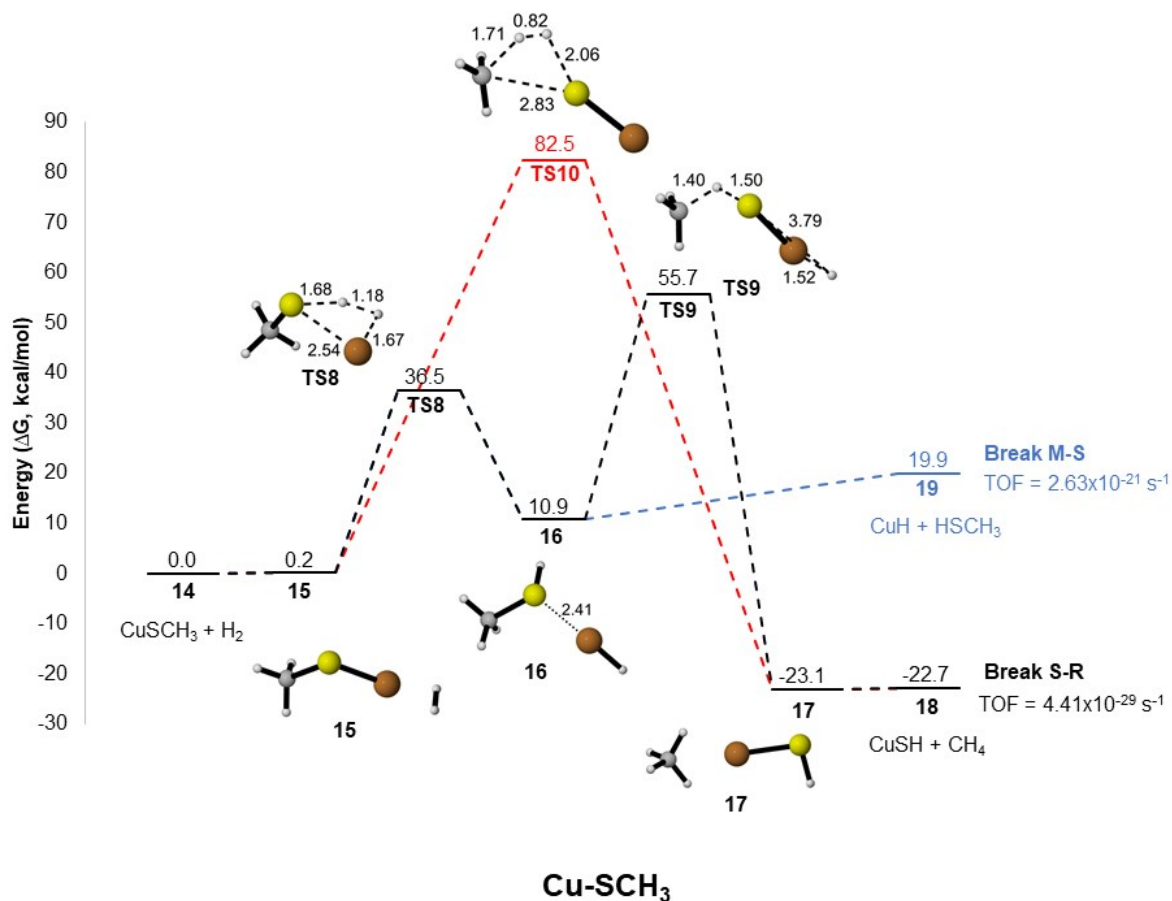

**Figure S11.** Reaction coordinate diagram depicting break M-S (concerted, blue) and two break S-R (concerted in red and stepwise in black) mechanisms on the CuSCH<sub>3</sub> complex.

1. P. J. Stephens, F. J. Devlin, C. F. Chabalowski and M. J. Frisch, *The Journal of Physical Chemistry*, 1994, **98**, 11623-11627.
2. A. D. Becke, *The Journal of chemical physics*, 1993, **98**, 5648-5652.
3. L. E. Roy, P. J. Hay and R. L. Martin, *J Chem Theory Comput*, 2008, **4**, 1029-1031.
4. H. P. Hratchian and H. B. Schlegel, *J. Chem. Phys.*, 2004, **120**, 9918-9924.
5. S. Kozuch and S. Shaik, *Acc. Chem. Res.*, 2011, **44**, 101-110.
6. C. Y. Legault, *Université de Sherbrooke*, 2009, **CYLview 1.0b**, (<http://www.cylview.org>).
